# Supplementary material for: Monkeys and Humans Share a Common Computation for Face/Voice Integration
Source: PubMed Central journal article supplement (PMC3182859; doi:10.1371/journal.pcbi.1002165), 2011-09-29

**A**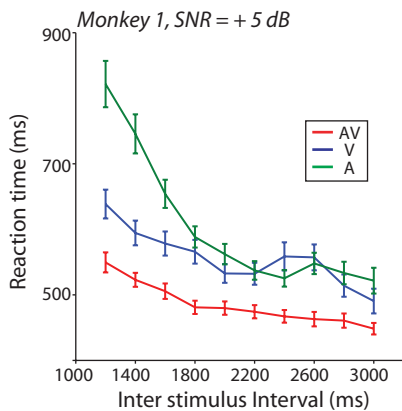**B**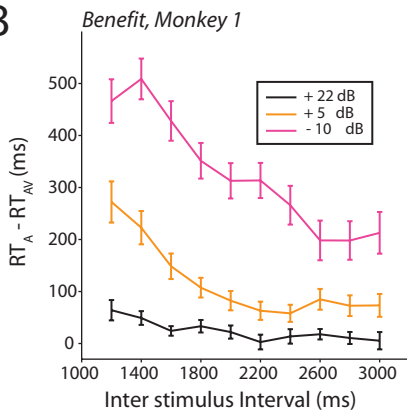**C**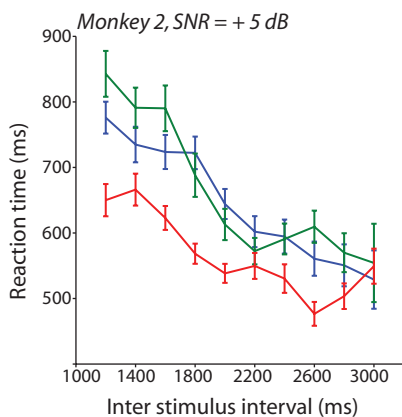**D**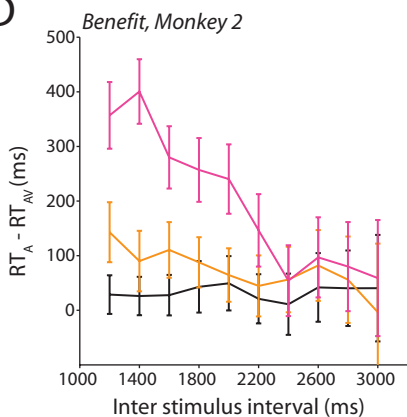**E**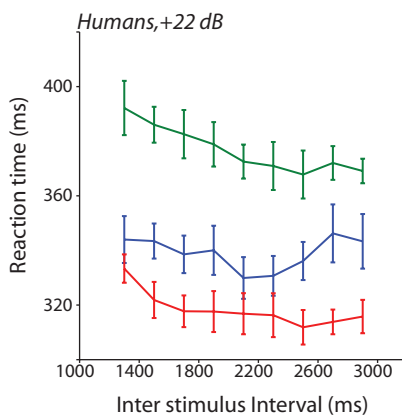**F**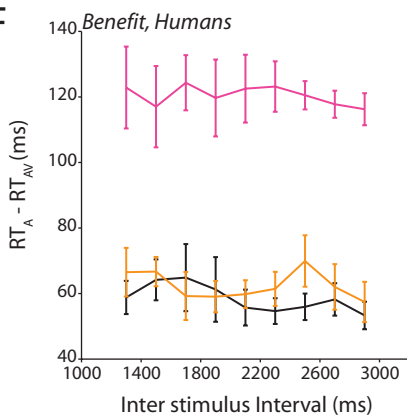

Supplement: pcbi.1002165.s002.pdf [file pcbi.1002165.s002.pdf]
