# Supplementary material for: Monkeys and Humans Share a Common Computation for Face/Voice Integration
Source: PubMed Central journal article supplement (PMC3182859; doi:10.1371/journal.pcbi.1002165), 2011-09-29
Supplement: pcbi.1002165.s005.pdf [file pcbi.1002165.s005.pdf]

## RT profiles

## Benefit profiles

Original

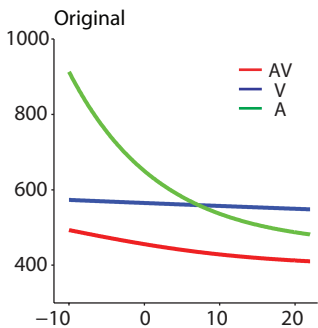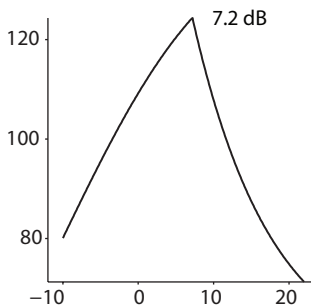

Speed up = 40 ms

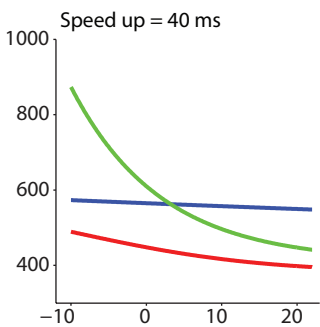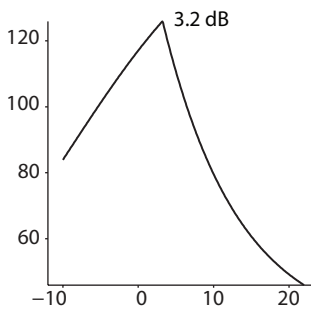

Speed up = 80 ms

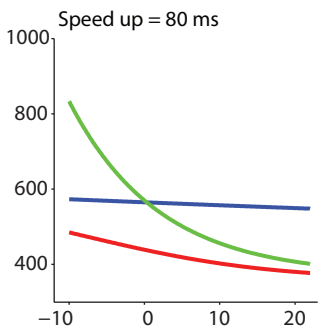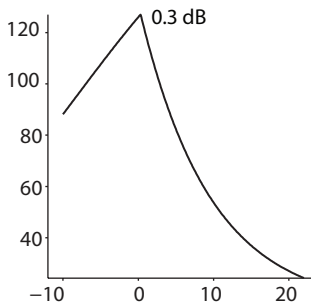

Speed up = 120 ms

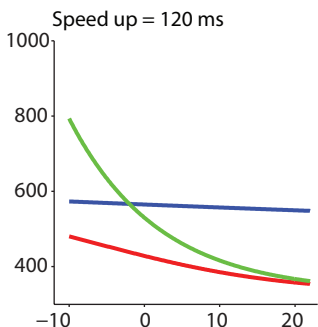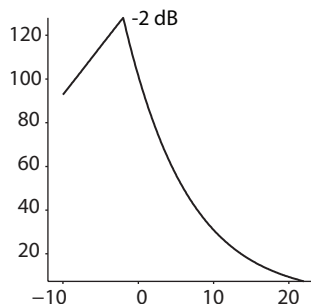

Reaction time (ms)

Benefit (ms)

SNR (dB)
